# Supplementary material
Source: publisher site journal article supplement (https://dez.pensoft.net/article/58217/download/suppl/32/)
Supplement: Supplementary file 1

## Sheet: Tabelle1
Abbr.	Name	HAO URI	Rietschel (1937)	Kumpanenko and Gladun (2018)
dT7-T8	dorsal tergum 7-tergum 8 muscle†		muscle 1
vT7-T8 (a & b)	ventral tergum 7-tergum 8 muscle (a & b)†		muscle 2
pT7-T8	posterior tergum7-tergum 8 muscle		muscle 3
S7-T8	sternum 7-tergum 8 muscle†		muscle 8
dT8-T9	dorsal tergum 8-tergum 9 muscle	http://purl.obolibrary.org/obo/HAO_0001571	muscle 10	M2
lT8-T9	lateral tergum 8-tergum 9 muscle	http://purl.obolibrary.org/obo/HAO_0001776	muscle 11	M3
T8-1vf	tergum 8-first valvifer muscle	http://purl.obolibrary.org/obo/HAO_0001640	muscle 14	M4
T8-T8	tergum 8-tergum 8 muscle†		muscle 13
vT8-T9	ventral tergum 8-tergum 9 muscle‡
dT9-2vf a	dorsal tergum 9-second valvifer muscle a	http://purl.obolibrary.org/obo/HAO_0001569	muscle 17a	M5a
dT9-2vf b	dorsal tergum 9-second valvifer muscle b		muscle 17b	M5b
vT9-2vf	ventral tergum 9-second valvifer muscle	http://purl.obolibrary.org/obo/HAO_0001616	muscle 18	M6
pT9-2vf	posterior tergum 9-second valvifer muscle	http://purl.obolibrary.org/obo/HAO_0001813		M7
2vf-2vf	second valvifer-second valvifer muscle‡
l2vf-fu	lateral second valvifer-furcula muscle†			M8
m2vf-fu	medial second valvifer-furcula muscle†		muscle 19a	M9
† = newly named in HAO scheme
‡ = newly identified
